# Supplementary material
Source: MDPI journal article supplement (https://www.mdpi.com/1999-4907/12/5/592)
Supplement: s1 [file s1]

**Table 1.** Characteristics of 26 cpSSR loci for PCR amplification in ancient *P. orientalis*.

| ID  | Primer sequence (5'–3')                              | Repeat motif | Expected PCR<br>product size (bp) | Location             | Tm (°C) | Species                       | Amplification | Polymorphism |
|-----|------------------------------------------------------|--------------|-----------------------------------|----------------------|---------|-------------------------------|---------------|--------------|
| N1  | TTCTAGCTCGCACCCAACT<br>TTGTTTCGCCGATATGTCA           | (AC)6        | 209                               | rbcl/accD IR         | 56      | <i>Cupressus gigantea</i>     | +             | Yes          |
| N2  | TGGTCATACCAATTGCTGTCA<br>TGGGCTACTCTACGTGCTTT        | (AT)5        | 388                               | rps19/rp122 IR       | 56      | <i>Cupressus gigantea</i>     | +             | Yes          |
| N4  | TCGGAAGAAGAAGATGATATGTAG<br>C CCCCAGATATGGAACCTTTTGG | (AAGGACAAA)5 | 138                               | rps12 Exon1/clpP IR  | 56      | <i>Cupressus gigantea</i>     | +             | No           |
| N6  | GGGAACAACCAGAATTGGAA<br>GCCACTTTTATGGCAGCACT         | (TA)5        | 365                               | ycf1                 | 56      | <i>Cupressus gigantea</i>     | +             | Yes          |
| N8  | GGGAAGCGAAAGCTATTTT<br>GGTAATCCACAGCAGCCAAT          | (AT)6        | 265                               | rpoB                 | 56      | <i>Cupressus gigantea</i>     | +             | No           |
| N9  | CAAATTTCTCGCCAAGCTGT<br>TGATTTCATCGGGTCGAATA         | (TA)12       | 210                               | atpF Exon2/ atpA IR  | 56      | <i>Cupressus gigantea</i>     | +             | No           |
| N10 | TCGGGAACGAAAGAGAAAGA<br>ACATAGATGTTATGGAGCAGAGC      | (CA)5        | 290                               | trnG-UCC intron      | 56      | <i>Cupressus gigantea</i>     | +             | No           |
| N11 | TCCAATCTAGAACATCTCATCCAG<br>CAGTGCTCTACCTAATCTGAAAGC | (AT)6        | 226                               | trnG-UCC/psaM IR     | 56      | <i>Cupressus gigantea</i>     | -             | No           |
| N13 | TCGCCGAATACTCCTAATC<br>ATTCCGAAAAGATGGCTTCA          | (AT)5        | 277                               | rpl33/rps18 IR       | 56      | <i>Cupressus sempervirens</i> | +             | No           |
| N14 | TCCATATCTGGTGGACAGGA<br>GGGTTTIGGTCTTCTTCTCG         | (AT)6        | 141                               | rps12 Exon1/clpP IR  | 56      | <i>Cupressus sempervirens</i> | +             | No           |
| N15 | CCAGGTCGAGACAAGTGGAT<br>GAAACCAATGCCCTAAGCAA         | (AT)6        | 350                               | rrn16/trnI-GAU IR    | 56      | <i>Cupressus sempervirens</i> | +             | No           |
| N16 | ATTCGATCCCTATCCGGTCT<br>ACCAGAGCCATCAACCACTC         | (AT)5        | 253                               | psbZ/trnS-UGA IR     | 56      | <i>Cupressus sempervirens</i> | -             | No           |
| N18 | AAAATCGCCGCAATACTCCT<br>ATTCCGAAAAGATGGCTTCA         | (AC)6        | 276                               | rpl33/rps18 IR       | 56      | <i>Juniperus bermudiana</i>   | +             | No           |
| N19 | CGGACCTACCGACAGAAGCTC<br>CCGAAGAAATAAGAAGCTGTATAGG   | (AGA)6       | 369                               | rps12 Exon1/ clpP IR | 56      | <i>Juniperus monosperma</i>   | +             | No           |
| N20 | CTTGCTCCTAGCCATGAAAA<br>TGATTTCATCGGGTCGAATAG        | (AT)5        | 277                               | atpF/atpA IR         | 56      | <i>Juniperus monosperma</i>   | +             | No           |
| N22 | CTGTGATGCCGTTGATATTGA<br>TGCCCATTATCCCTCTGTTC        | (CA)5        | 334                               | psbI/psbK IR         | 56      | <i>Juniperus monosperma</i>   | +             | No           |
| N23 | TCCTCTGCGATCTTTATAGGG<br>GGGAAGGATTGTTGGATTGA        | (AT)6        | 270                               | chlB/trnK-UUU IR     | 56      | <i>Juniperus monosperma</i>   | +             | No           |
| N25 | CCTCATACGGCTTCTCGTTC<br>AAAATGAACCCGAAGGATT          | (TA)5        | 271                               | rps12/trnV-GAC IR    | 56      | <i>Juniperus bermudiana</i>   | +             | No           |
| N27 | TGATTTCATCGGGTCGAATA<br>CAAATTTCTCGCCAAGCTGT         | (AT)7        | 314                               | aptA/aptF IR         | 56      | <i>Juniperus bermudiana</i>   | +             | No           |
| N28 | GAGATGAACGCAGAGCGTAA<br>TGTTTGAGCGATTCTACCC          | (AT)7        | 203                               | psbM/trnD-GUC IR     | 56      | <i>Juniperus bermudiana</i>   | +             | No           |
| N29 | GCCATGGTAAGGCGTAAGTC<br>TCAGTCAATGGGTTAGGTTCA        | (TA)5        | 365                               | trnT-GGU/ psbD IR    | 56      | <i>Juniperus bermudiana</i>   | -             | No           |
| N31 | GTAGCCAAGTGGTTCCAAGG<br>CAATCTTACCGTCGATTACAGC       | (AT)5        | 254                               | trnH-GUG/chlL IR     | 56      | <i>Juniperus bermudiana</i>   | +             | No           |
| N32 | GGACGGGAAAGGAAAAGAA<br>TGGTATTCTTCTGGGTTTGG          | (AT)5        | 219                               | rps12 Exon1/ clpP IR | 56      | <i>Juniperus scopulorum</i>   | +             | No           |
| N33 | CTGTTCCCCTGTGCATCATA<br>AGGAGGAAAATCCGTTGGTT         | (TCT)5       | 400                               | trnF-GAA/trnL-UAA IR | 56      | <i>Juniperus scopulorum</i>   | +             | Yes          |

|     |                                               |        |     |                  |    |                             |   |    |
|-----|-----------------------------------------------|--------|-----|------------------|----|-----------------------------|---|----|
| N34 | TCAGTCAATGGGTTAGGTICA<br>GCCATGGTAAGGCGTAAGTC | (TCT)5 | 365 | PsbD/trnT-GGU IR | 56 | <i>Juniperus virginiana</i> | - | No |
| N35 | TGTTTGAGCGATTCTACCC<br>GAGATGAACGCAGAGCGTAA   | (AT)6  | 203 | tmD-GUC/ psbM IR | 56 | <i>Juniperus virginiana</i> | + | No |

Note: Successful amplification (+); Unsuccessful amplification (-); Presence polymorphism (Yes); Absence polymorphism (No)
